# Supplementary material
Source: MDPI journal article supplement (https://www.mdpi.com/1999-4907/13/6/942)
Supplement: s1 [file s1]

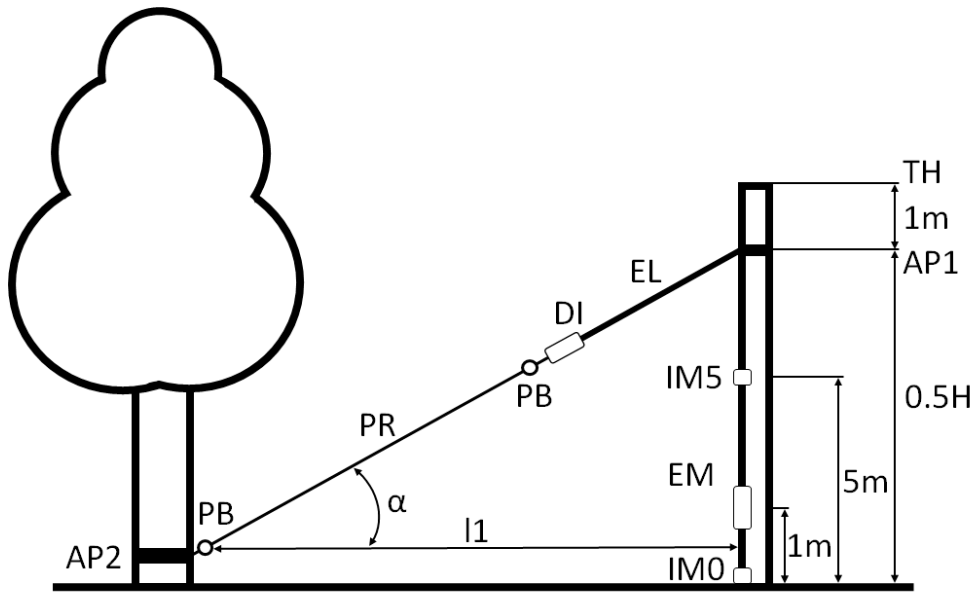

**Figure S1.** A scheme of the destructive static pulling test setup. AP1 and AP2—anchoring points of pulling line; PB—pulley block; PR—polyester rope; EL—extension of pulling line; DI— dynamometer;  $\alpha$ — the slope angle between the pulling line and ground surface;  $l_1$ —the distance to the sample tree from the anchoring tree; IM0 and IM5—inclinometers at the height of 0 and 5 m, respectively; EM—elastometer;  $0.5H$ — half of the initial tree height; TH—topping height.

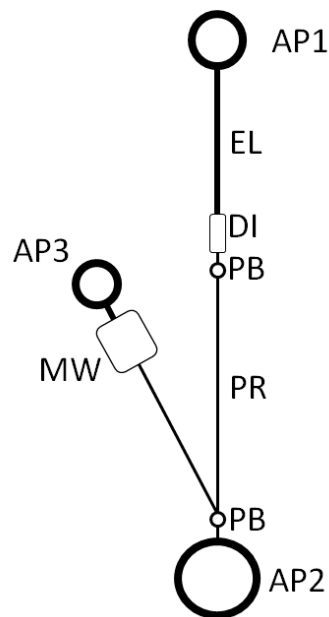

**Figure S2.** A scheme of the placement of motor-winch in the static pulling test setup. AP1, AP2 and AP3—anchoring points; MW—motor-winch; PB—pulley block; PR—polyester rope; EL— extension of pulling line; DI— dynamometer.
